# Supplementary material
Source: PubMed Central journal article supplement (PMC4590643)
Supplement: kaup-11-08-1063871-s002.pdf [file kaup-11-08-1063871-s002.pdf]

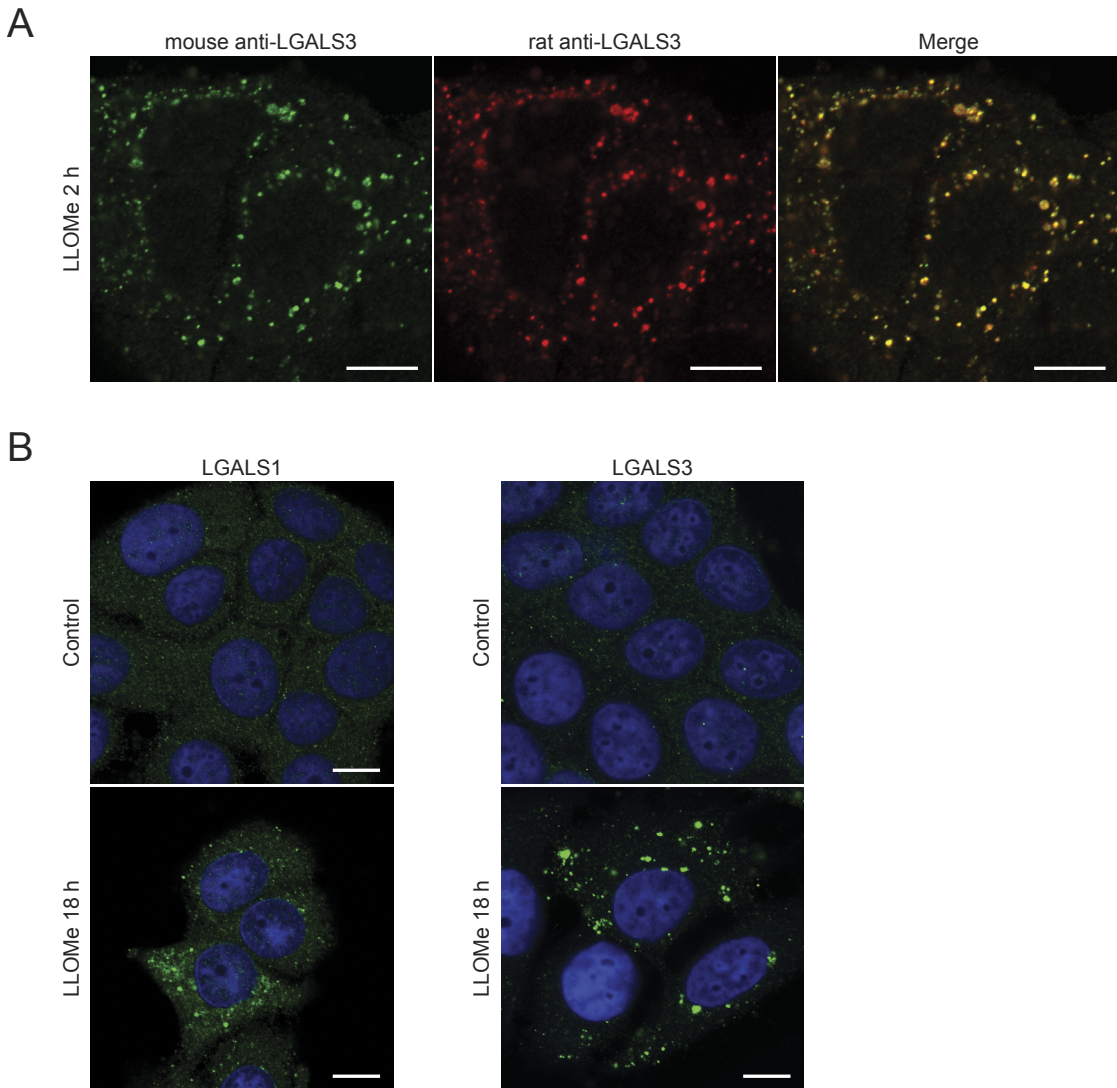

**Figure S1.** Comparison of LGALS3 antibodies and staining after methanol fixation. **(A)** MCF7 cells were treated with 2 mM LLOMe for 2 h and costained with mouse (green) and rat anti-LGALS3 (red) antibodies. Representative confocal microscopy images are shown. **(B)** MCF7 cells were treated with 2.5 mM LLOMe for 18 h, fixed in ice-cold methanol and stained with rabbit anti-LGALS1 or mouse anti-LGALS3 antibodies (green). Nuclei were labelled with Hoechst 33342 (blue). Representative confocal microscopy images are shown. Scale bars: 10  $\mu$ m.
