# Supplementary material
Source: PubMed Central journal article supplement (PMC4590643)
Supplement: kaup-11-08-1063871-s003.pdf [file kaup-11-08-1063871-s003.pdf]

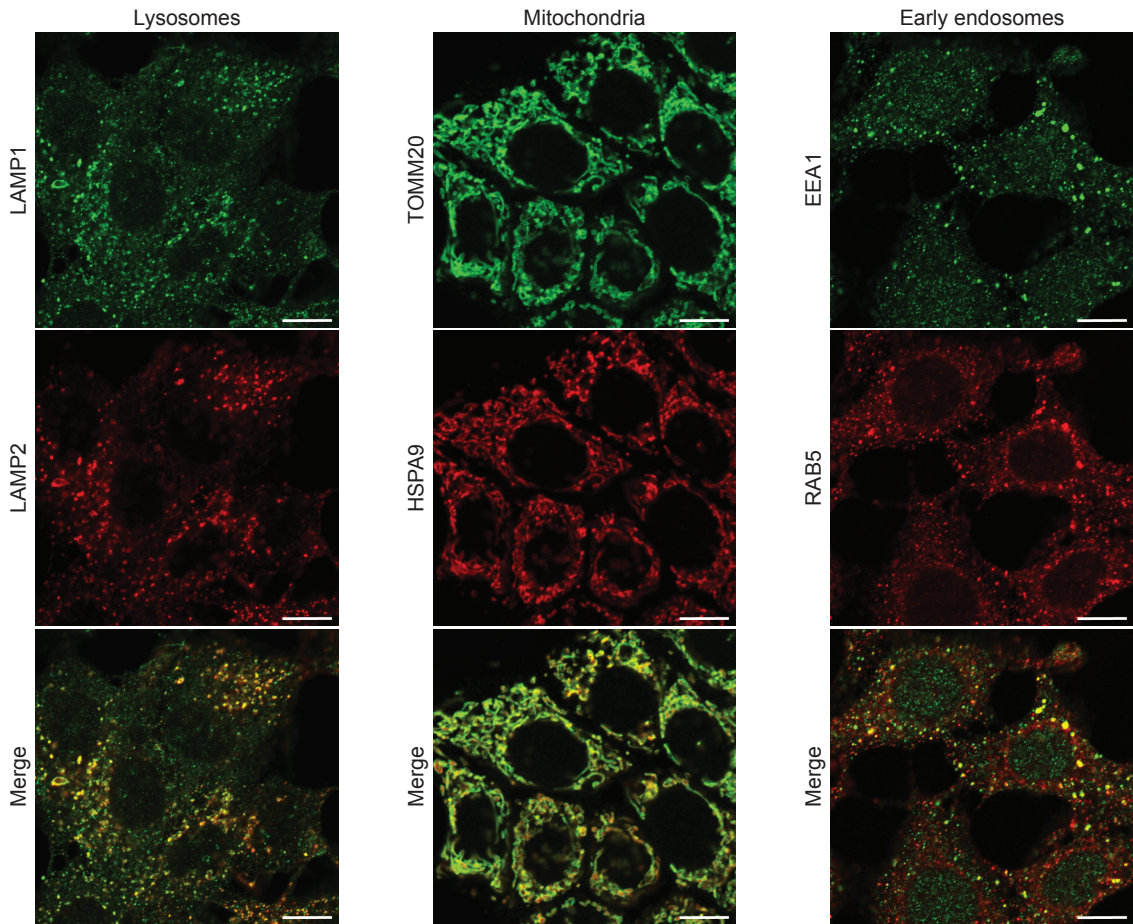

**Figure S2.** Overlap between different markers for lysosomes, mitochondria and early endosomes. MCF7 cells were costained for different markers of the same organelle, i.e. LAMP1 and LAMP2 for lysosomes, TOMM20 and HSPA9 for mitochondria, or EEA1 and RAB5 for early endosomes. Representative confocal microscopy images are shown. Scale bars: 10  $\mu\text{m}$ .
