# Supplementary material
Source: PubMed Central journal article supplement (PMC4590643)
Supplement: kaup-11-08-1063871-s004.pdf [file kaup-11-08-1063871-s004.pdf]

A

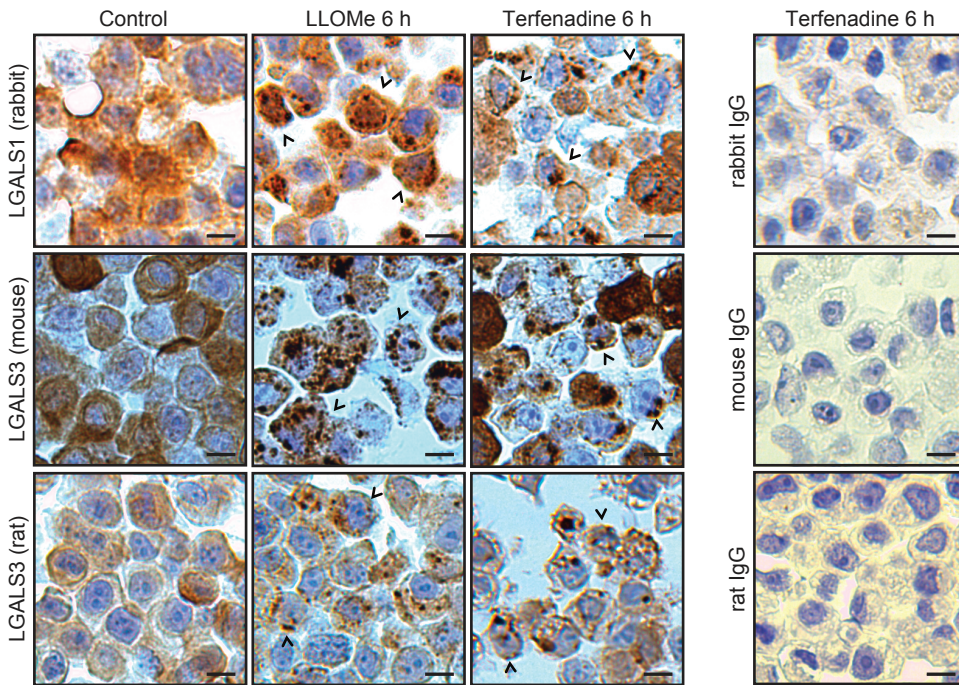

B

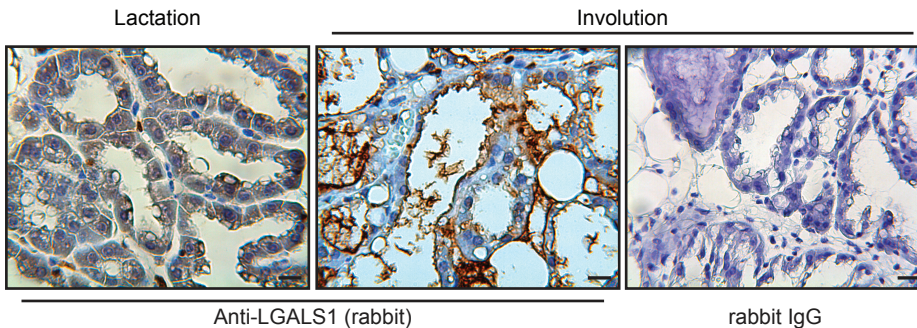

**Figure S3.** Galectin staining of paraffin-embedded samples. **(A)** MCF7 cells were treated with 2 mM LLOMe or 8  $\mu$ M terfenadine for 6 h, detached, washed, pelleted, fixed in 4% formaldehyde and embedded in paraffin. After deparaffinization, blocking and antigen retrieval, 4- $\mu$ m sections were stained with rabbit anti-LGALS1 (0.2  $\mu$ g/ml), rat anti-LGALS3 (1:1000) or mouse anti-LGALS3 antibodies (0.25  $\mu$ g/ml) and matching HRP-coupled secondary antibodies (EnVision Reagent, mouse and rabbit, DAKO, K4001 and K4003 and rabbit anti-rat antibodies, DAKO, P0450; 1:1000). Rabbit IgG (DAKO, X0903; 0.2  $\mu$ g/ml), rat IgG (Life Technologies, 02-9602; 2.5  $\mu$ g/ml) and mouse IgG (DAKO, X0931; 0.25  $\mu$ g/ml) were used as negative controls. Representative bright field images are shown. Examples of cells with galectin puncta are indicated by arrowheads. Scale bars: 10  $\mu$ m. **(B)** Lower magnifications of the sections in **Figure 7B** showing lactating (10 d) and involuting (24 h) mouse mammary glands stained with rabbit anti-LGALS1 antibodies (0.1  $\mu$ g/ml). Rabbit IgG (2  $\mu$ g/ml) was used as a negative control. Scale bars: 20  $\mu$ m.
